# Supplementary material for: Multiscale design principles for noncovalent heteroaryl phosphonate inhibitors targeting NDM-1
Source: Royal Society of Chemistry journal article supplement (doi:10.1039/d5me00205b), 2026-01-01

**Multiscale Design Principles for Noncovalent Heteroaryl Phosphonate  
Inhibitors Targeting NDM-1**

*Alessandra Moraes Balieiro, Thavendran Govender, Hendrik G. Kruger, Tricia Naicker,  
Jerônimo Lameira and José Rogério A. Silva*

**Supplementary Information**

**Figure S1.** Bar plots depicting the average atomic distances corresponding to the data shown in Table 2.

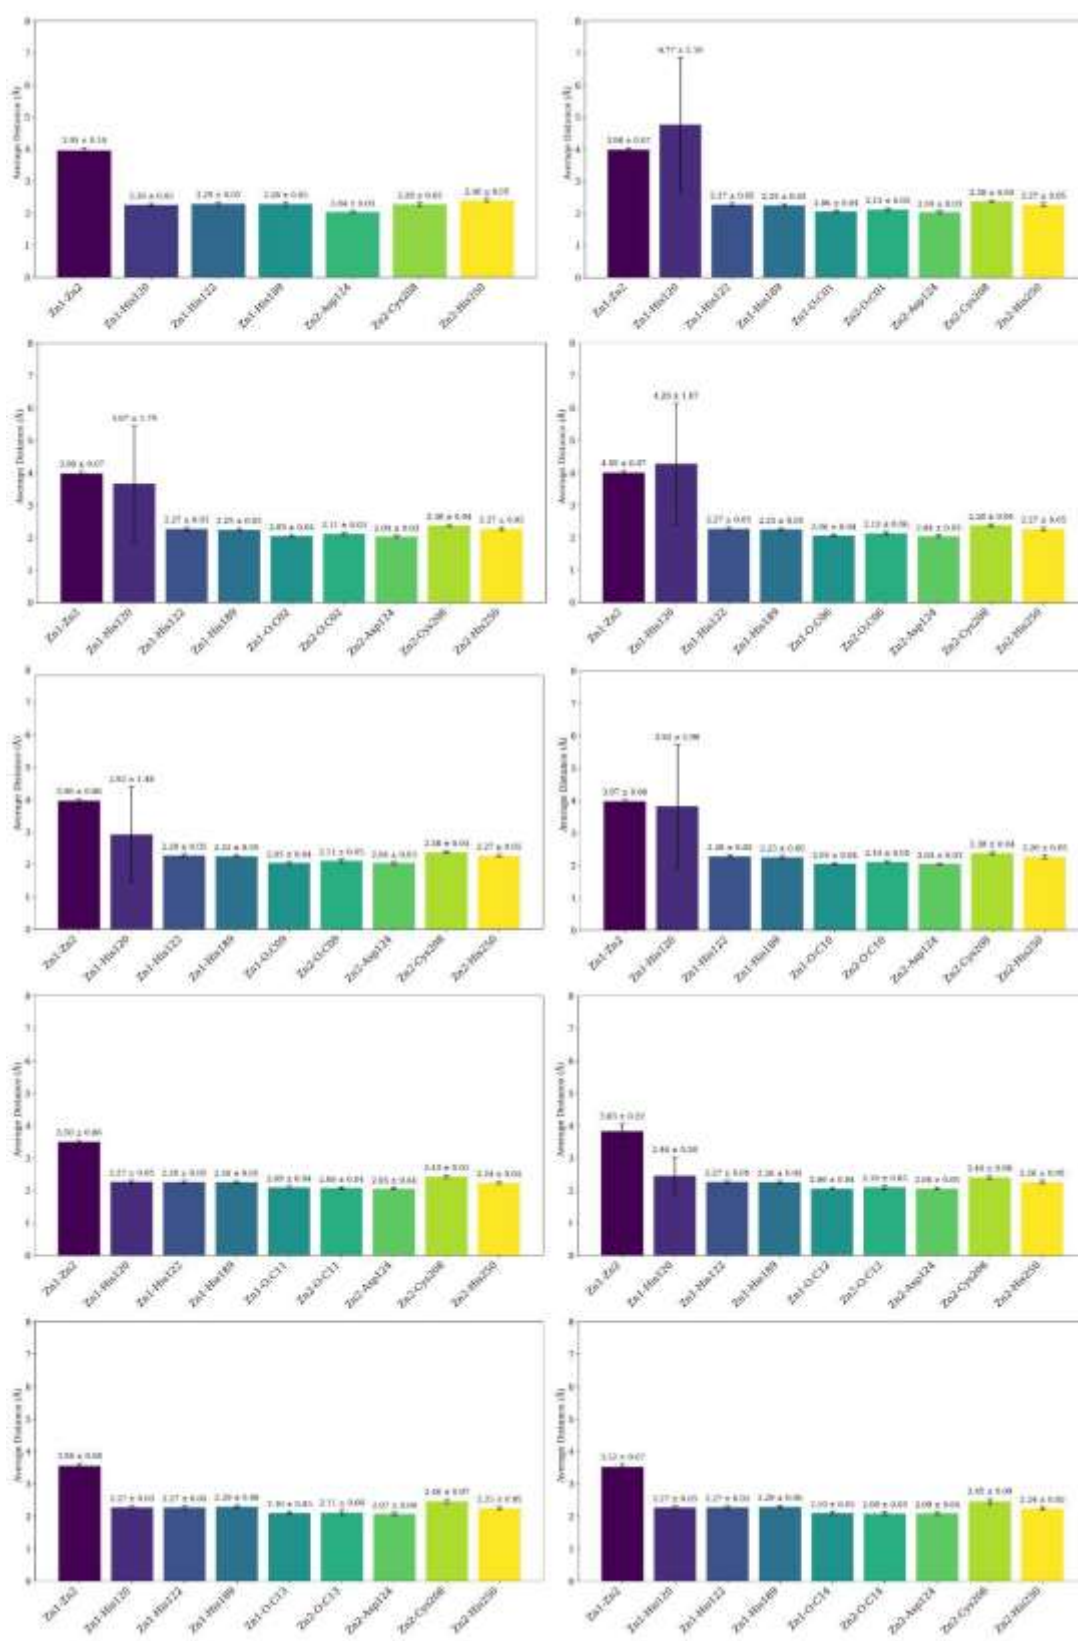

**Figure S2.** RMSD plots for all NDM-1 systems (in triplicate).

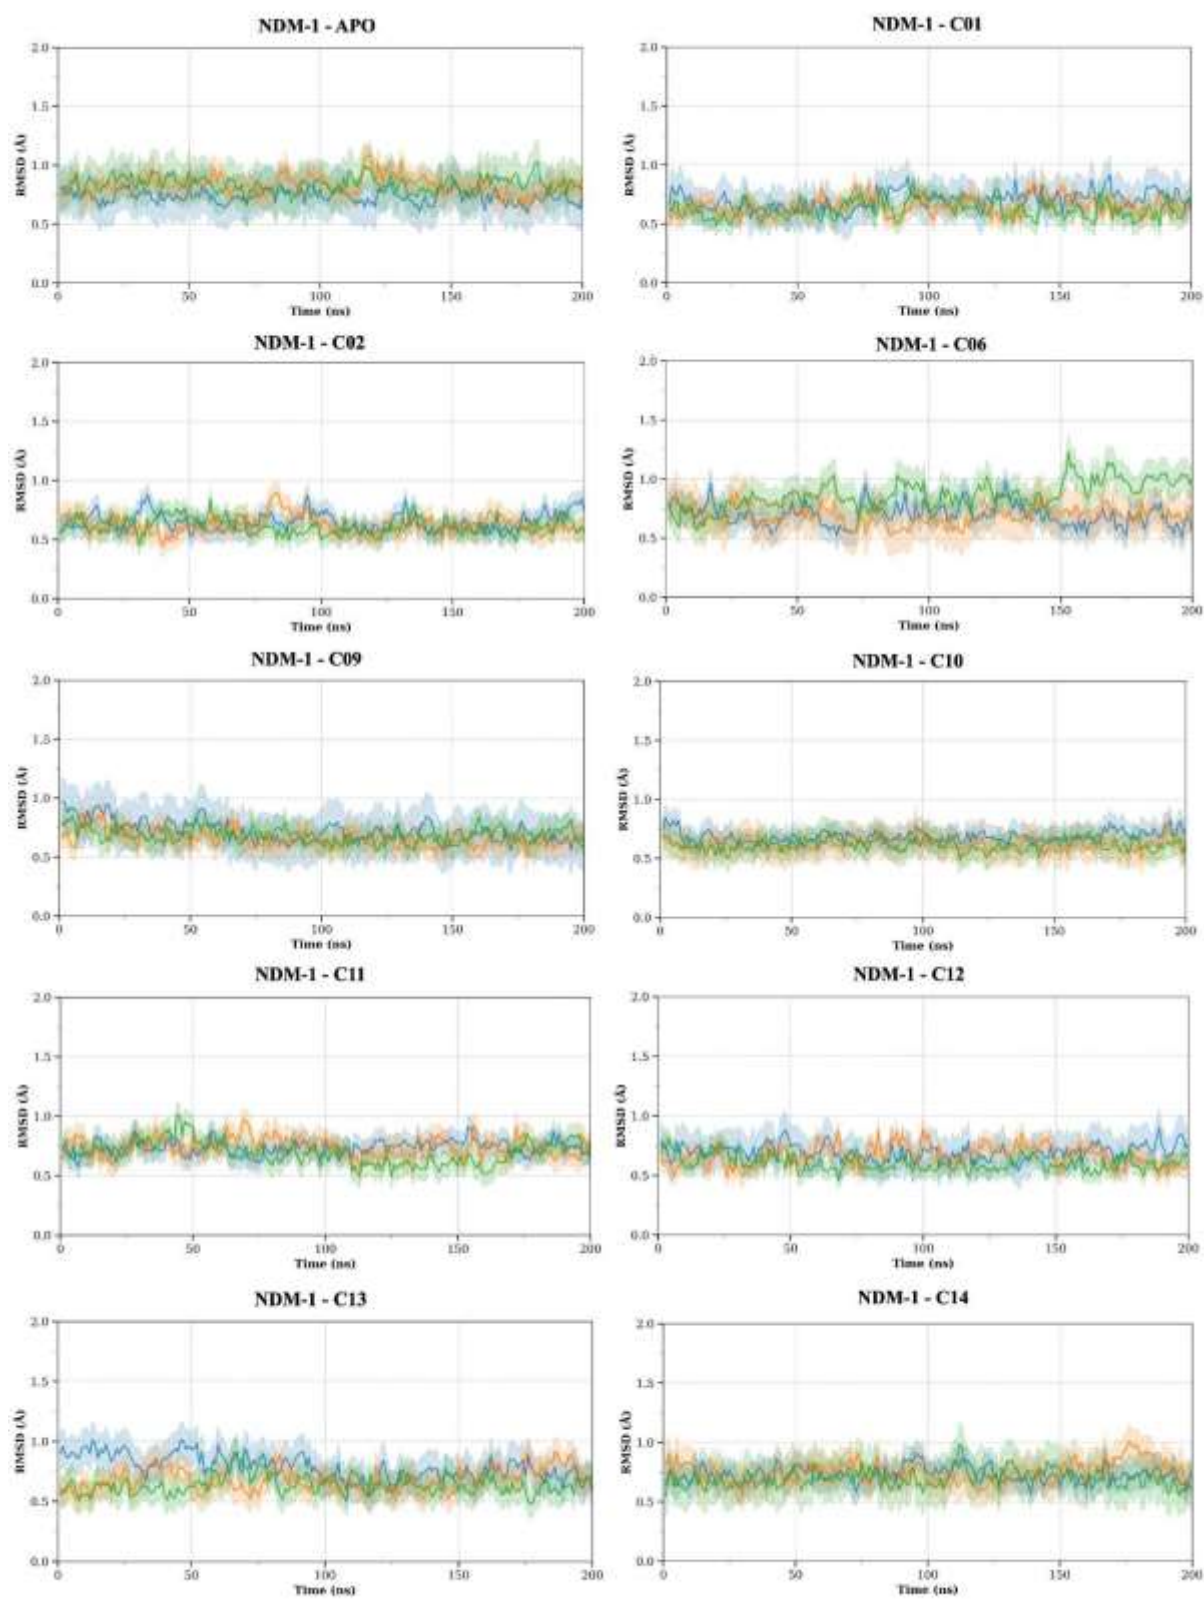

**Figure S3.** RMSF plots for all NDM-1 systems (in triplicate).

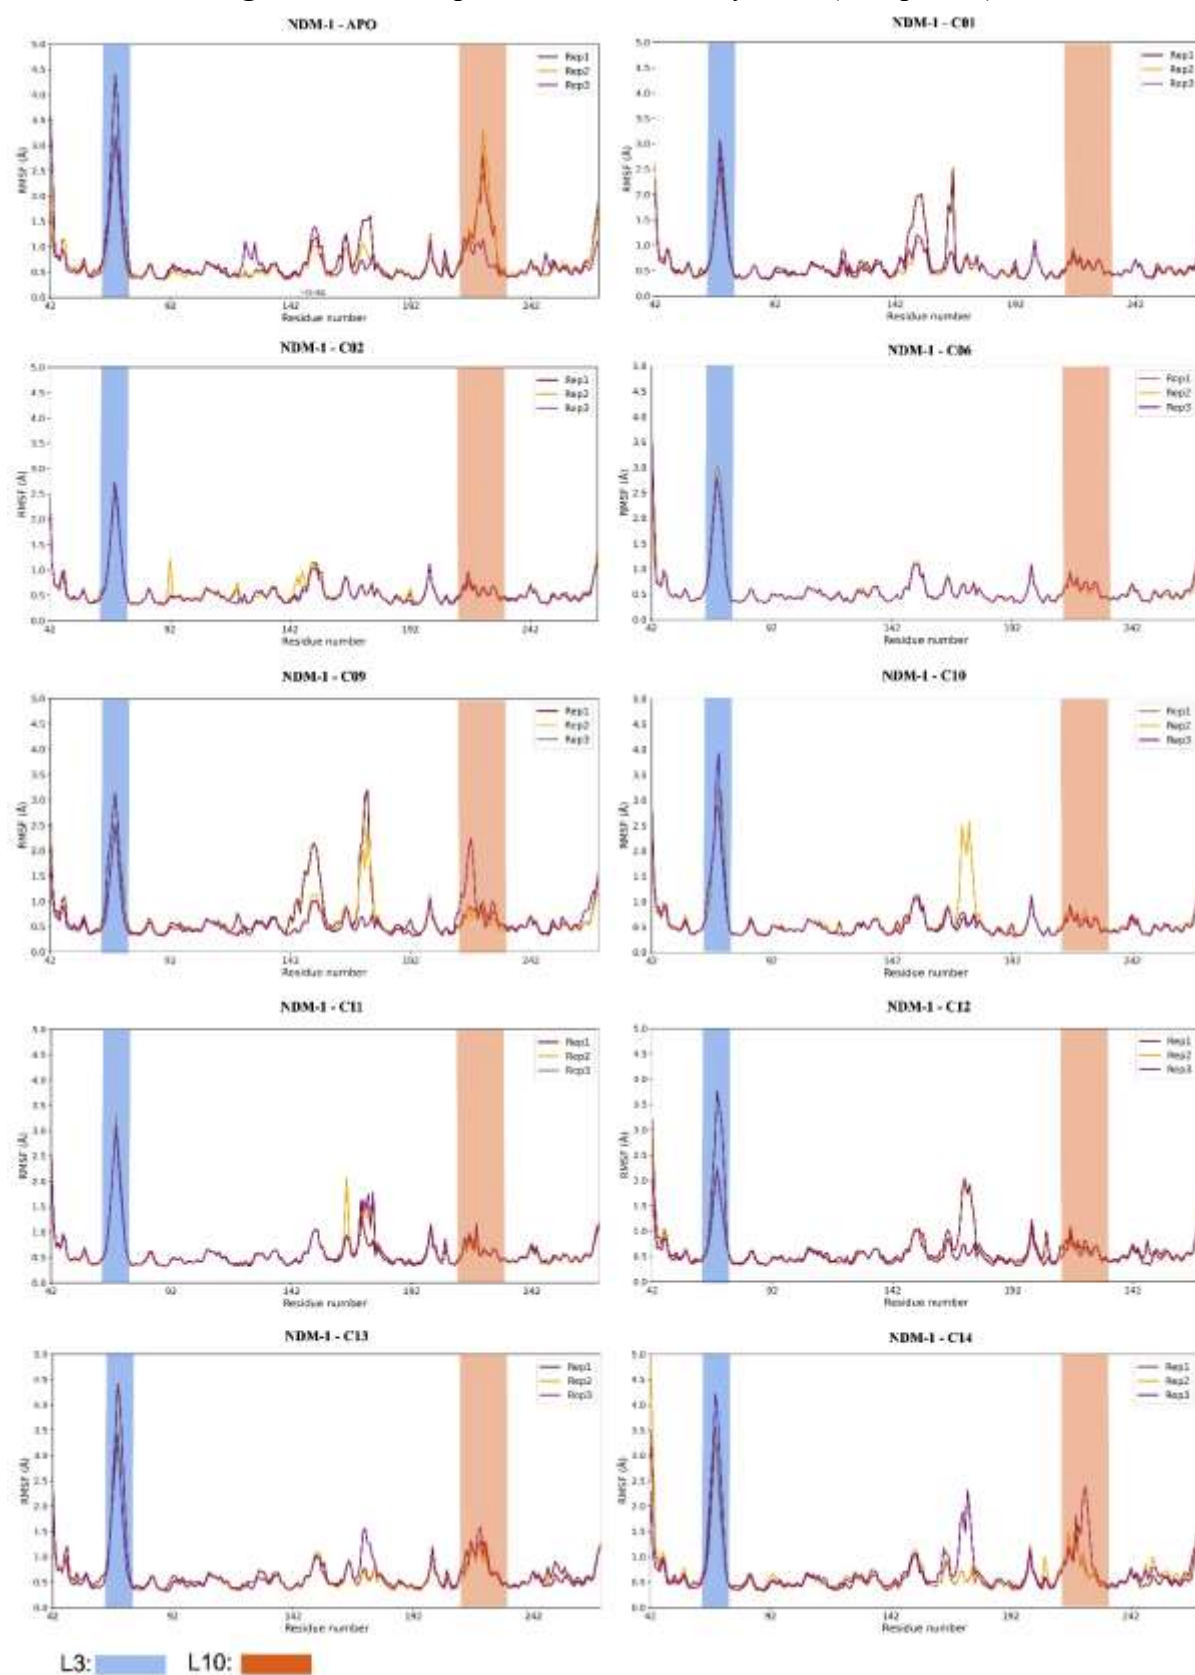

**Figure S4.** PCA plots for all NDM-1 systems (in triplicate).

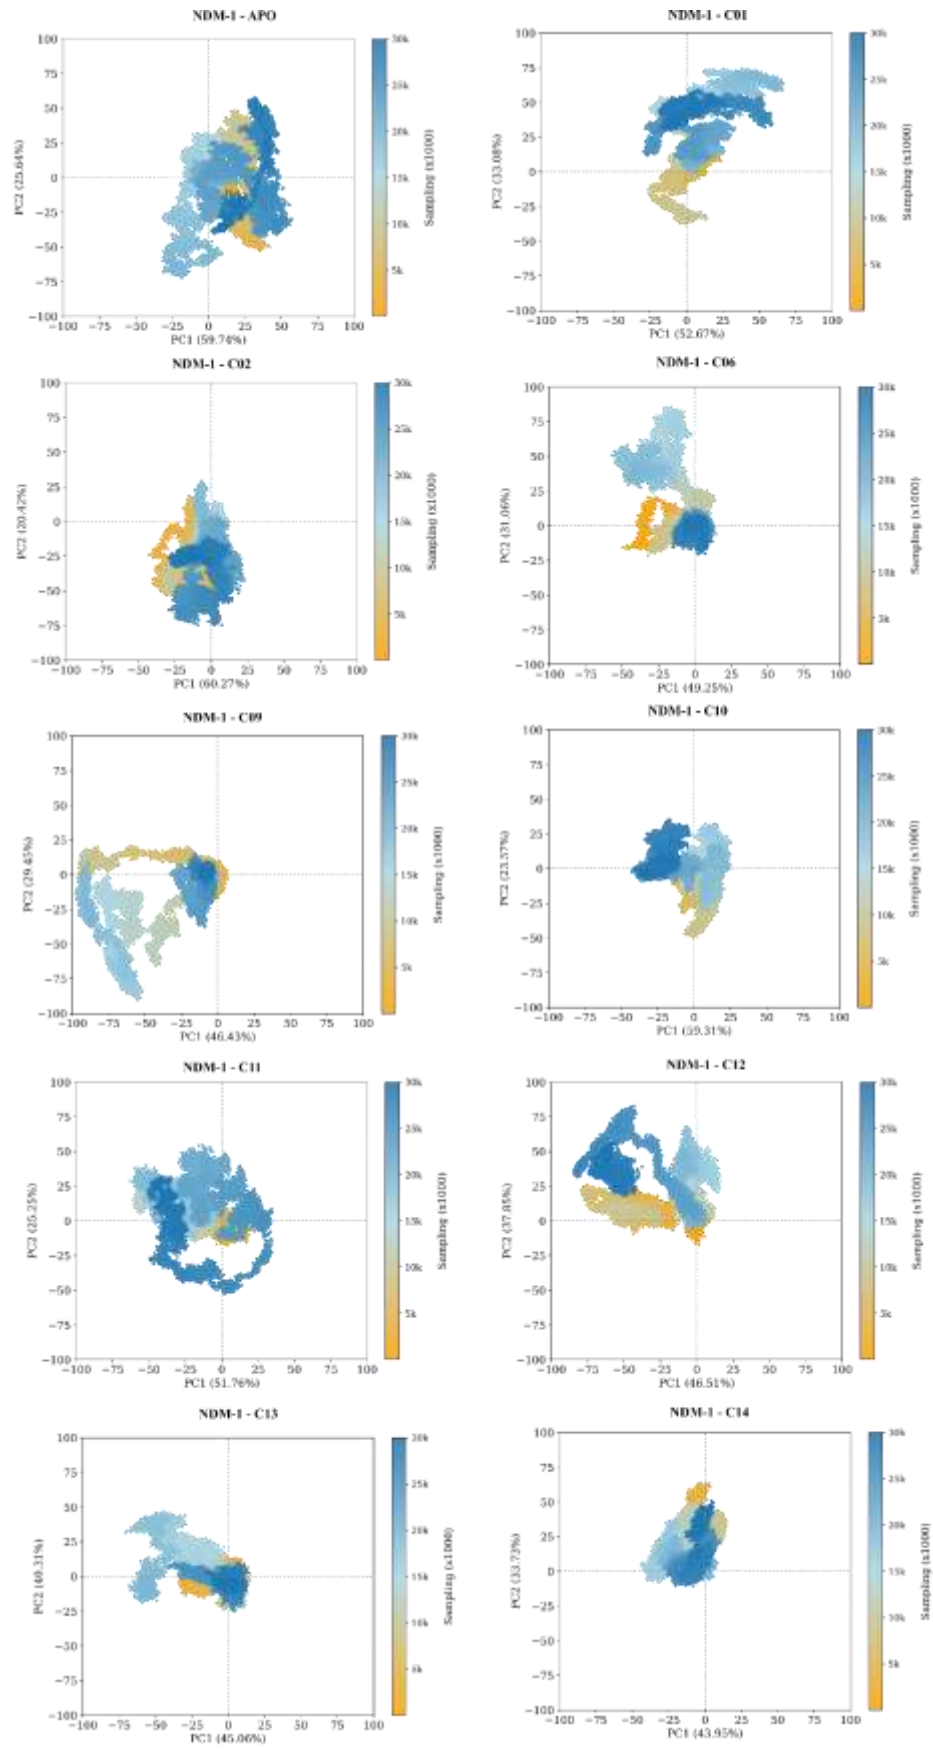



**Figure S5.** FEL plots for all NDM-1 systems (in triplicate).

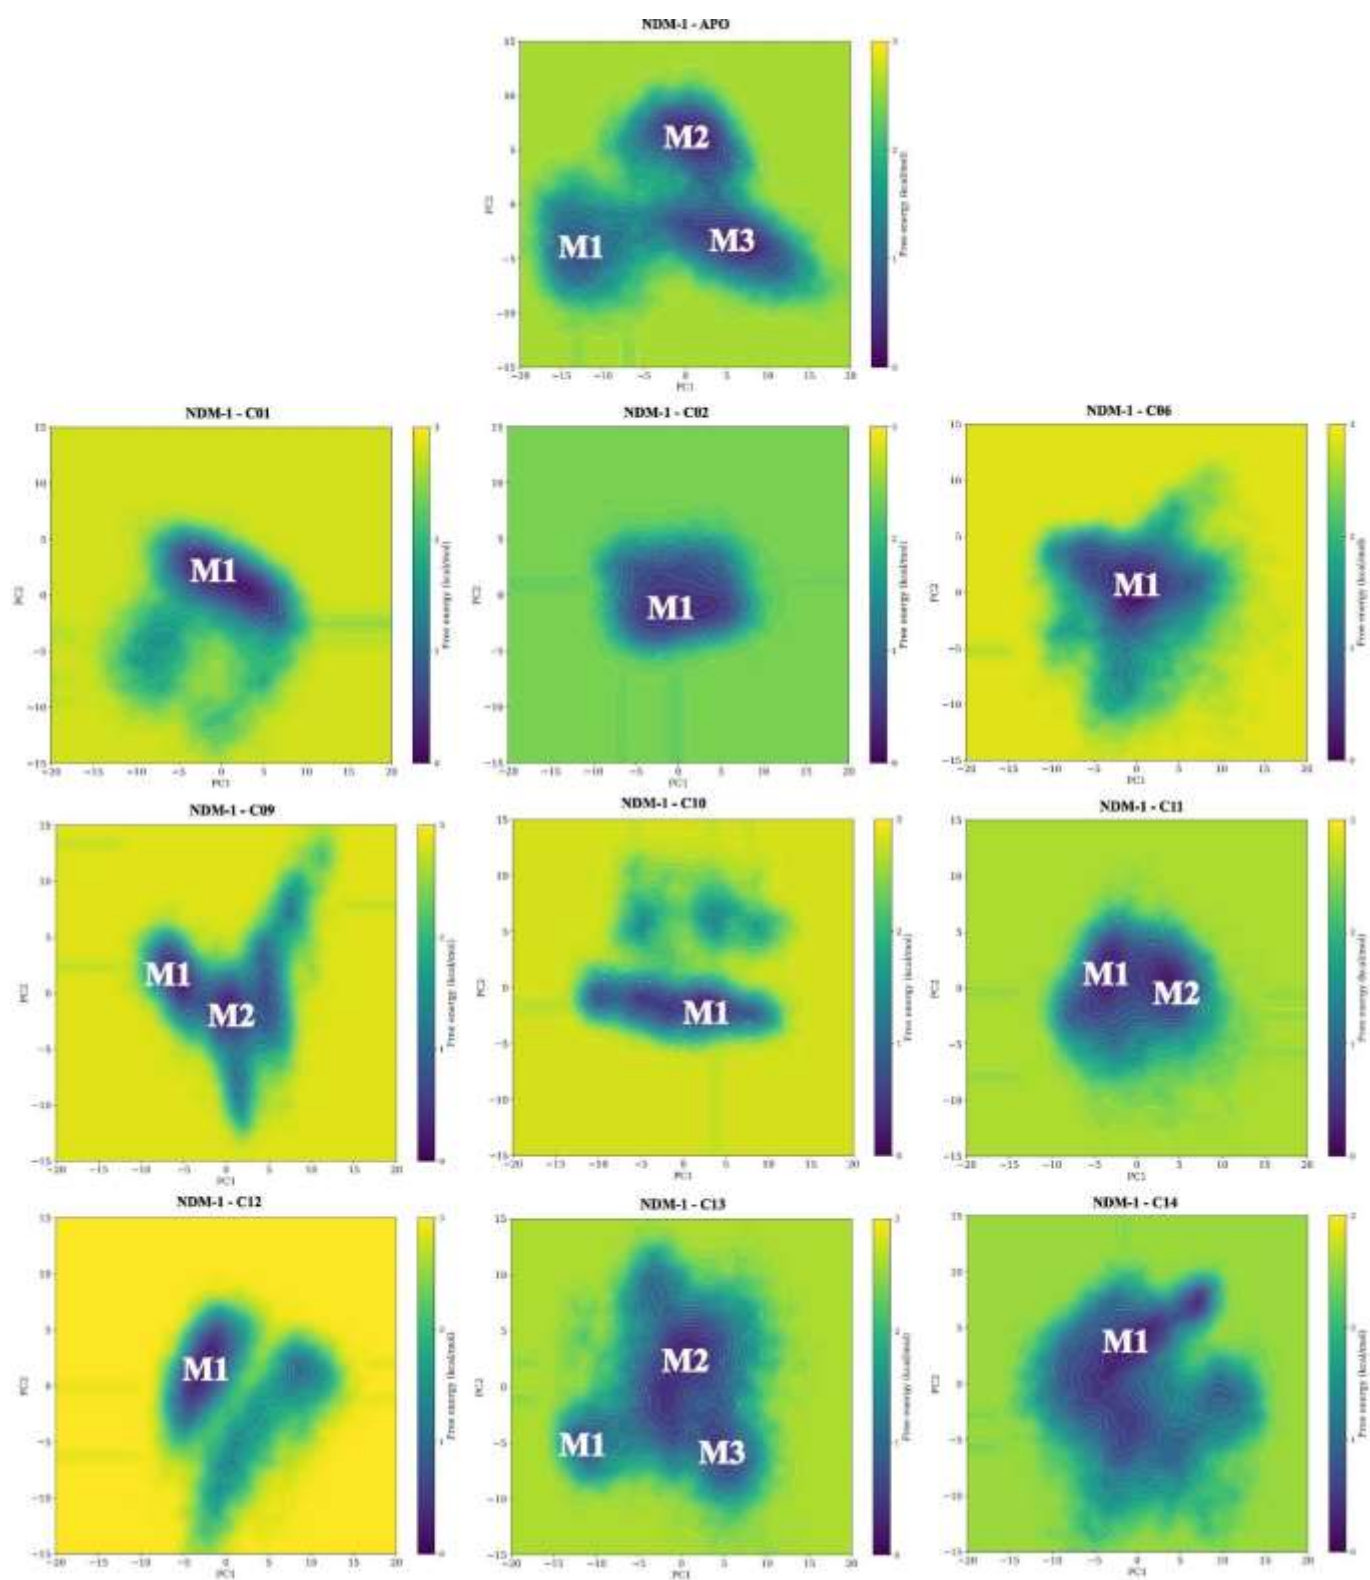

**Figure S6.** Linear regression plots for A)  $\Delta G_{\text{EXP}}$  versus  $E_{\text{vdW}}$  and B)  $\Delta G_{\text{EXP}}$  versus  $\Delta E_{\text{vdW}}$ .

All values are reported in kcal/mol.

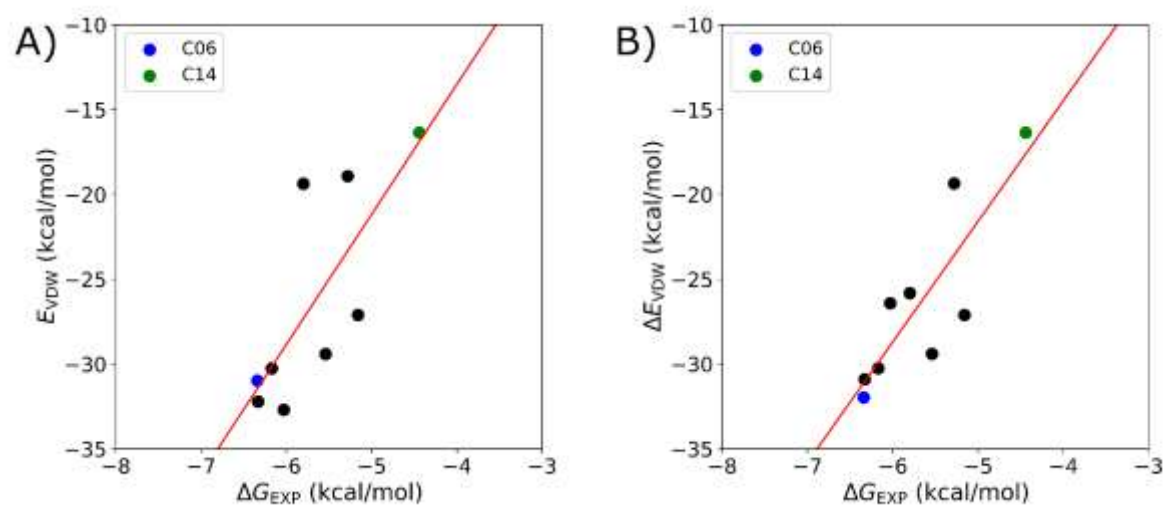

Supplement: d5me00205b1.pdf [file d5me00205b1.pdf]
